# Supplementary material for: Clathrin-mediated endocytosis cooperates with bulk endocytosis to generate vesicles
Source: PubMed Central journal article supplement — iScience. 2022 Jan 24;25(2):103809. doi: 10.1016/j.isci.2022.103809 (PMC8841809; doi:10.1016/j.isci.2022.103809), 2022-01-24
Supplement: mmc1.pdf [file mmc1.pdf]

**iScience, Volume 25**

**Supplemental information**

**Clathrin-mediated endocytosis cooperates  
with bulk endocytosis to generate vesicles**

**Gianvito Arpino, Agila Somasundaram, Wonchul Shin, Lihao Ge, Seth Villareal, Chung Yu Chan, Uri Ashery, Oleg Shupliakov, Justin W. Taraska, and Ling-Gang Wu**

# Supplementary Information

Supplementary information contains Figure S1.

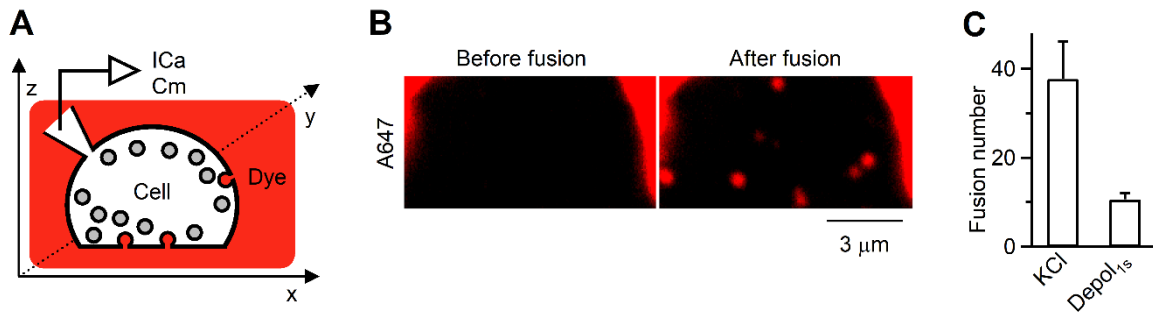

Figure S1. Imaging vesicle fusion induced by KCl (90 mM, 90 s) application and by a 1-s depolarization, related to Figure 2.

(A) Schematic drawing showing whole-cell recording of  $I_{Ca}$  and capacitance ( $C_m$ ), and imaging at the cell-bottom with a fluorescent dye (red) in the bath.

(B) Confocal images of vesicle fusion in a fraction of a cell at the bottom (above the coverslip) in a bath solution containing Alexa 647 (A647, 30  $\mu M$ ) in the bath.

Left panel: the dark area before fusion at the cell-bottom represents a thin layer of A647 solution between the cell-bottom and the coverslip. Images were taken at 1 s before stimulation.

Right panel: A647 spots are observed after fusion. Images were taken at 0.5 s after a 1-s depolarization from -80 to +10 mV (depol<sub>1s</sub>).

(C) The number of fusion spots induced by 90 mM KCl application for 90 s (12 cells) and by depol<sub>1s</sub> (60 cells). Fusion events from the cell bottom in an area of  $\sim 70 - 160 \mu m^2$  were counted per cell.
